# Supplementary material for: Expression of a CO2-permeable aquaporin enhances mesophyll conductance in the C4 species Setaria viridis
Source: eLife. 2021 Nov 29;10:e70095. doi: 10.7554/eLife.70095 (PMC8648302; doi:10.7554/eLife.70095)
Supplement: Figure 1—source data 1. [file elife-70095-fig1-data1.xlsx]

## Sheet: Fig 1a
	Expression atlas of the SiPIP genes
			Absolute Expression (FPKM)
	Gene name	Gene ID	Root	Leaves	Shoot	Panicle	All tissue Avg.
	SiPIP1;1	Seita.7G196700	454	407	666	855	595.5
	SiPIP1;2	Seita.1G264900	1680	159	965	2225	1257.25
	SiPIP1;5	Seita.1G372300	837	21	15	20	223.25
	SiPIP1;6	Seita.4G089800	26	0	0	0	6.5
	SiPIP2;1	Seita.2G123000	703	424	366	915	602
	SiPIP2;4	Seita.1G241900	177	5	2	2	46.5
	SiPIP2;5	Seita.7G170200	170	2	10	4	46.5
	SiPIP2;6	Seita.2G123200	16	15	14	8	13.25
	SiPIP2;7	Seita.2G123300	46	0.4	1	10	14.35
	SiPIP2;2	Seita.9G219400	0	0	0	0	0
	SiPIP2;3	Seita.9G268100	7	0	0.1	0	1.775
	SiPIP2;8	Seita.2G291500	2	25	0.2	2	7.3
	HK - PP2A	Seita.9G260100	48	66	53	52	54.75
	HK - DUSP	Seita.4G136400	36	23	25	38	30.5

## Sheet: Fig 1c
	CO2 permeability assay on yeast
		Experiment	Mean	SE
	SiPIP2;1	1	0.7465	0.06376
		2	0.75873	0.07898
	SiPIP2;4	1	0.79164	0.07813
		2	0.71926	0.12603
	SiPIP2;5	1	1.13805	0.10915
		2	0.73339	0.03632
	SiPIP2;7	1	1.60087	0.12161
		2	1.43296	0.12424
	hCA only	1	0.72419	0.04414
		2	0.73322	0.10353

## Sheet: Fig 1d
	Water permeability using Freeze-Thaw (FT) assay
		Untreated				FT-treated				Mean		SE
		Rep 1	Rep 2	Rep 3	Rep 4	Rep 1	Rep 2	Rep 3	Rep 4	Untreated	FT-treated	Untreated	FT-treated
	SiPIP2;1	1.00677	1.03018	0.943048	1.02	0.0336482	0.0486548	0.0521024	0.0467651	1	0.0452926	0.0195793	0.00403566
	SiPIP2;4	0.955322	0.962297	1.07484	1.00754	0.491151	0.380015	0.292786	0.443876	1	0.401957	0.0275007	0.0429268
	SiPIP2;5	1.08442	1.00071	0.916302	0.99857	0.405388	0.4238	0.48113	0.407629	1	0.429487	0.0343207	0.0176962
	SiPIP2;7	1.01748	1.0055	1.0114	0.965621	0.548444	0.434554	0.569034	0.545349	1	0.524345	0.011718	0.0303885
	515.GUS	1.06397	0.972431	0.9326	1.031	0.110378	0.0480519	0.000774349	0.0553935	1	0.0536494	0.0293767	0.0224504
