# Supplementary material for: Expression of a CO2-permeable aquaporin enhances mesophyll conductance in the C4 species Setaria viridis
Source: eLife. 2021 Nov 29;10:e70095. doi: 10.7554/eLife.70095 (PMC8648302; doi:10.7554/eLife.70095)
Supplement: Figure 3—source data 1. [file elife-70095-fig3-data1.xlsx]

## Sheet: Fig 3a
	Azygous									Line 27								Line 44							Line 52
	1	2	3	4	5	6	Mean	SE		1	2	3	4	5	Mean	SE		1	2	3	4	Mean	SE		1	2	3	4	5	6	Mean	SE
Ci	2.92454	2.37497	3.03533	3.12125	2.82283	3.18731	2.91104	0.119902		3.07268	2.98947	2.60073	2.34981	2.41588	2.68571	0.147458		2.33677	3.19021	2.80454	2.60315	2.73367	0.179819		1.45619	3.52748	2.27317	2.4675	3.05682	2.58211	2.56055	0.288245
	14.1248	14.5811	12.8526	15.2027	12.5754	15.3388	14.1126	0.478268		15.0999	12.2595	14.6221	13.8907	11.267	13.4279	0.723563		12.3975	14.8761	13.9107	11.5533	13.1844	0.745495		11.6238	14.8358	12.5162	15.9469	11.1159	11.8212	12.9766	0.798304
	18.43	21.5273	20.133	23.0773	19.2459	21.4509	20.6441	0.694506		22.5733	17.2967	21.4034	20.452	17.5437	19.8538	1.04952		18.7748	22.5109	19.7425	16.7889	19.4543	1.18995		18.4652	21.8028	19.053	25.2608	15.0792	16.2251	19.3144	1.52558
	26.4962	32.0017	26.7454	33.0187	27.5524	30.0412	29.3092	1.1419		32.3429	24.5473	30.4537	29.8672	28.7459	29.1914	1.299		29.1141	31.8255	27.7119	23.2285	27.97	1.79634		26.8511	31.2065	28.1731	34.9386	22.5505	22.6103	27.7217	1.98374
	58.7737	73.843	80.5345	75.5438	71.5278	62.9869	70.5349	3.32819		77.411	59.3855	70.8392	77.4864	78.1528	72.655	3.57467		72.6655	71.9513	67.2549	55.8418	66.9284	3.88549		66.1137	70.9147	77.7538	79.1977	57.2779	54.6277	67.6476	4.18574
	94.4876	121.377	153.327	112.188	117.536	100.363	116.547	8.45504		132.432	102.392	123.942	150.196	138.863	129.565	8.03202		126.102	116.895	123.211	102.299	117.127	5.30321		128.447	117.108	126.653	136.701	110.5	93.0328	118.74	6.35309
	136.054	162.704	199.933	155.386	163.352	137.009	159.073	9.54172		190.99	159.2	165.693	215.866	187.74	183.898	10.0707		171.739	162.008	168.512	170.005	168.066	2.12426		183.895	159.528	175.976	195.624	174.345	118.701	168.011	10.9875
	197.276	256.954	314.596	217.525	256.778	218.566	243.616	17.1706		318.18	275.452	273.068	343.903	288.112	299.743	13.6509		249.293	273.625	253.996	304.706	270.405	12.5894		294.809	254.922	256.448	312.757	306.242	168.512	265.615	21.8728
	266.338	360.592	411.652	279.511	304.314	308.512	321.82	22.3046		414.014	327.247	366.742	441.402	339.026	377.686	21.838		341.143	353.14	298.373	402.61	348.816	21.4396		369.839	313.72	313.192	427.336	412.511	206.209	340.468	33.2084
	360.369	457.344	570.665	376.547	360.44	394.407	419.962	33.5365		500.224	406.772	495.485	511.517	403.98	463.596	23.9145		405.594	442.065	352.683	507.707	427.013	32.5599		458.233	413.709	400.375	555.527	491.928	316.936	439.451	33.5557
	474.362	569.333	743.074	465.352	471.882	520.456	540.743	43.5885		610.985	490.416	660.855	574.183	501.016	567.491	32.4136		509.978	538.342	490.937	608.889	537.037	25.8551		571.716	534.482	566.435	719.572	658.873	362.52	568.933	49.8627
	619.796	727.002	917.702	585.13	617.904	675.607	690.523	49.8487		756.256	607.107	854.163	762.59	603.269	716.677	48.7051		633.549	687.668	658.314	755.591	683.781	26.3686		717.517	692.44	758.512	927.076	848.434	535.896	746.646	55.154
	789.867	924.04	1105.74	745.604	833.604	886.161	880.836	52.0484		960.463	768.295	1055.23	948.233	828.145	912.074	50.9215		805.913	881.217	867.858	935.272	872.565	26.57		940.499	870.287	962.581	1145.05	1065.15	696.349	946.652	63.817
A	-0.1814	-0.140575	-0.28838	-0.0399936	-0.136947	-0.215639	-0.167156	0.0341751		-0.119605	-0.146728	0.125567	-0.0776509	-0.0494987	-0.0535832	0.0478152		-0.0382392	-0.292891	-0.237059	-0.115931	-0.17103	0.0576478		-0.117496	-0.00117174	-0.0614294	-0.0955547	-0.146366	-0.22844	-0.10841	0.0315187
	4.26886	5.56264	5.46207	5.65964	4.90286	4.75928	5.10256	0.223908		5.74381	4.49914	4.88833	5.23523	6.11242	5.29579	0.289132		5.61293	5.52435	6.41737	5.18255	5.6843	0.26138		6.70321	5.4472	5.6608	6.5499	4.80237	5.1857	5.72486	0.308801
	6.60849	8.44466	8.62743	8.24921	7.61187	7.24388	7.79759	0.319705		8.74839	6.96418	7.45411	8.17036	9.31373	8.13015	0.424335		8.4167	8.00432	9.95497	7.95615	8.58303	0.468842		10.3365	8.09239	8.46992	9.93906	7.47181	7.80689	8.6861	0.480992
	8.49566	10.4336	11.5186	10.244	10.1575	9.34669	10.0327	0.418811		11.3611	9.09294	9.6008	10.5487	11.5641	10.4335	0.481791		10.4283	9.96426	12.8681	10.4693	10.9325	0.655295		13.3012	10.2306	10.4727	13.1577	9.35705	10.0143	11.0889	0.693891
	15.5703	18.3033	19.3115	18.0766	17.3488	17.1485	17.6265	0.517476		19.9827	16.2932	16.8233	18.1871	19.072	18.0716	0.685109		17.806	17.8534	23.0123	19.4502	19.5305	1.22189		22.5907	18.1942	16.7682	23.6829	16.2243	17.8764	19.2228	1.2796
	21.2696	24.1729	21.923	24.2166	21.1181	23.2066	22.6511	0.573414		26.0708	21.4872	20.8624	21.5832	23.0267	22.6061	0.935942		22.2165	23.7578	27.9582	26.2839	25.0541	1.28056		27.1784	23.8252	20.9472	29.9666	20.5354	23.7167	24.3616	1.48719
	24.4103	27.5773	23.5078	26.7887	22.7234	26.4264	25.239	0.80189		28.775	23.9879	22.7901	23.7374	25.2138	24.9009	1.04282		23.9051	26.311	30.2909	29.1014	27.4021	1.43329		28.6536	26.694	23.7157	33.7264	22.0818	26.0979	26.8282	1.67017
	25.5179	29.8969	25.0944	27.4929	24.6727	29.9015	27.096	0.97026		31.4815	26.1322	24.6685	26.1917	27.613	27.2174	1.16331		26.0358	28.5933	33.0106	31.3592	29.7497	1.53715		30.3322	29.1255	26.0743	36.9761	23.7367	25.652	28.6495	1.93342
	26.4515	30.1012	25.9384	28.2449	25.9189	31.9748	28.1049	1.01959		32.4553	26.9326	26.7515	28.0896	29.2048	28.6868	1.04042		26.7647	29.6861	34.6664	33.2952	31.1031	1.78726		31.1708	30.1582	27.9291	38.4488	24.6887	26.2549	29.7751	1.99164
	27.7563	31.0114	26.6765	30.1209	26.0916	32.9823	29.1065	1.10298		32.5493	27.3546	27.9775	29.2964	30.1958	29.4747	0.914913		28.4183	30.8278	35.9382	34.1479	32.3331	1.68033		31.6421	30.7907	29.4623	39.1545	25.3919	28.5411	30.8304	1.8854
	28.3906	32.459	26.8867	31.8029	26.6235	33.3407	29.9172	1.21244		32.8879	27.8068	28.6362	30.2485	31.4711	30.2101	0.92236		29.0276	32.0163	36.7343	34.7385	33.1292	1.67451		32.293	31.3607	30.1553	39.4233	25.6258	29.8368	31.4492	1.84835
	29.0453	33.5779	27.3011	33.2764	27.613	33.4619	30.7126	1.24321		32.9295	28.5292	29.2548	30.5104	32.6116	30.7671	0.878622		29.81	32.9893	36.8072	34.8633	33.6175	1.48935		32.3184	32.0462	31.1218	39.2197	25.8078	30.5749	31.8481	1.76291
	29.5553	34.3671	27.2894	34.458	27.258	33.3963	31.054	1.40094		32.7677	29.0178	29.4695	31.2248	32.7227	31.0405	0.787603		30.6699	33.8667	37.0693	35.1867	34.1982	1.34719		32.3852	32.2358	31.5426	38.7644	25.8579	31.5573	32.0572	1.67403

## Sheet: Fig 3b
	Azygous								Line 27								Line 44							Line 52
	1	2	3	4	5	Mean	SE		1	2	3	4	5	Mean	SE		1	2	3	4	Mean	SE		1	2	3	4	5	6	Mean	SE
Ci	2.92454	2.37497	3.03533	3.12125	3.18731	2.92868	0.145251		3.07268	2.98947	2.60073	2.34981	2.41588	2.68571	0.147458		2.33677	3.19021	2.80454	2.60315	2.73367	0.179819		1.45619	3.52748	2.27317	2.4675	3.05682	2.58211	2.56055	0.288245
	14.1248	14.5811	12.8526	15.2027	15.3388	14.42	0.448698		15.0999	12.2595	14.6221	13.8907	11.267	13.4279	0.723563		12.3975	14.8761	13.9107	11.5533	13.1844	0.745495		11.6238	14.8358	12.5162	15.9469	11.1159	11.8212	12.9766	0.798304
	18.43	21.5273	20.133	23.0773	21.4509	20.9237	0.778597		22.5733	17.2967	21.4034	20.452	17.5437	19.8538	1.04952		18.7748	22.5109	19.7425	16.7889	19.4543	1.18995		18.4652	21.8028	19.053	25.2608	15.0792	16.2251	19.3144	1.52558
	26.4962	32.0017	26.7454	33.0187	30.0412	29.6606	1.33067		32.3429	24.5473	30.4537	29.8672	28.7459	29.1914	1.299		29.1141	31.8255	27.7119	23.2285	27.97	1.79634		26.8511	31.2065	28.1731	34.9386	22.5505	22.6103	27.7217	1.98374
	58.7737	73.843	80.5345	75.5438	62.9869	70.3364	4.06893		77.411	59.3855	70.8392	77.4864	78.1528	72.655	3.57467		72.6655	71.9513	67.2549	55.8418	66.9284	3.88549		66.1137	70.9147	77.7538	79.1977	57.2779	54.6277	67.6476	4.18574
	94.4876	121.377	153.327	112.188	100.363	116.349	10.3524		132.432	102.392	123.942	150.196	138.863	129.565	8.03202		126.102	116.895	123.211	102.299	117.127	5.30321		128.447	117.108	126.653	136.701	110.5	93.0328	118.74	6.35309
	136.054	162.704	199.933	155.386	137.009	158.217	11.6391		190.99	159.2	165.693	215.866	187.74	183.898	10.0707		171.739	162.008	168.512	170.005	168.066	2.12426		183.895	159.528	175.976	195.624	174.345	118.701	168.011	10.9875
	197.276	256.954	314.596	217.525	218.566	240.983	20.781		318.18	275.452	273.068	343.903	288.112	299.743	13.6509		249.293	273.625	253.996	304.706	270.405	12.5894		294.809	254.922	256.448	312.757	306.242	168.512	265.615	21.8728
	266.338	360.592	411.652	279.511	308.512	325.321	26.9787		414.014	327.247	366.742	441.402	339.026	377.686	21.838		341.143	353.14	298.373	402.61	348.816	21.4396		369.839	313.72	313.192	427.336	412.511	206.209	340.468	33.2084
	360.369	457.344	570.665	376.547	394.407	431.866	38.3988		500.224	406.772	495.485	511.517	403.98	463.596	23.9145		405.594	442.065	352.683	507.707	427.013	32.5599		458.233	413.709	400.375	555.527	491.928	316.936	439.451	33.5557
	474.362	569.333	743.074	465.352	520.456	554.516	50.65		610.985	490.416	660.855	574.183	501.016	567.491	32.4136		509.978	538.342	490.937	608.889	537.037	25.8551		571.716	534.482	566.435	719.572	658.873	362.52	568.933	49.8627
	619.796	727.002	917.702	585.13	675.607	705.047	58.4032		756.256	607.107	854.163	762.59	603.269	716.677	48.7051		633.549	687.668	658.314	755.591	683.781	26.3686		717.517	692.44	758.512	927.076	848.434	535.896	746.646	55.154
	789.867	924.04	1105.74	745.604	886.161	890.283	62.6873		960.463	768.295	1055.23	948.233	828.145	912.074	50.9215		805.913	881.217	867.858	935.272	872.565	26.57		940.499	870.287	962.581	1145.05	1065.15	696.349	946.652	63.817
PhiPSII	0.0741165	0.0728529	0.0604955	0.076198	0.0741165	0.0715559	0.00281672		0.0843885	0.0895748	0.0674454	0.0637479	0.0733716	0.0757056	0.00492144		0.0823743	0.0870127	0.0770083	0.0721816	0.0796442	0.00321956		0.0797684	0.0788886	0.0610364	0.0717298	0.0700532	0.0765949	0.0730119	0.0028684
	0.0949224	0.102806	0.0905239	0.116519	0.0949224	0.0999387	0.00459391		0.105854	0.110282	0.0987075	0.102734	0.104217	0.104359	0.00189623		0.11516	0.11268	0.114879	0.0946176	0.109334	0.00493673		0.125146	0.100828	0.0992496	0.10668	0.107265	0.104383	0.107259	0.00380375
	0.103278	0.118545	0.109905	0.128635	0.103278	0.112728	0.00486541		0.132507	0.124066	0.115724	0.115531	0.127748	0.123115	0.00333708		0.129932	0.130313	0.1306	0.112928	0.125943	0.00434068		0.139441	0.106851	0.112372	0.122667	0.118118	0.112061	0.118585	0.00472835
	0.11836	0.129072	0.129288	0.136986	0.11836	0.126413	0.00358347		0.142505	0.141448	0.123222	0.127609	0.131268	0.13321	0.00380239		0.13837	0.13913	0.153391	0.121494	0.138096	0.00652375		0.165592	0.123181	0.120119	0.147855	0.139354	0.122317	0.136403	0.00737169
	0.161612	0.165224	0.177509	0.194108	0.161612	0.172013	0.00624833		0.206324	0.200239	0.17318	0.170875	0.172561	0.184636	0.00768185		0.174624	0.191726	0.219787	0.174044	0.190045	0.0107288		0.231553	0.16999	0.160079	0.209485	0.190697	0.177707	0.189919	0.0108835
	0.188467	0.213245	0.190718	0.233576	0.188467	0.202894	0.00898082		0.245496	0.235764	0.204113	0.200036	0.192174	0.215516	0.0105434		0.203292	0.231201	0.254902	0.221343	0.227684	0.0107562		0.267178	0.203778	0.191745	0.252708	0.223386	0.209237	0.224672	0.0120464
	0.212834	0.238094	0.200312	0.249146	0.212834	0.222644	0.00903394		0.267046	0.252071	0.216045	0.207043	0.208369	0.230115	0.0123474		0.213225	0.254259	0.273522	0.234997	0.244001	0.0129258		0.285032	0.214555	0.201029	0.271683	0.240451	0.226319	0.239845	0.0133978
	0.228344	0.255024	0.208182	0.256028	0.228344	0.235184	0.00908514		0.279608	0.270869	0.227289	0.225986	0.225518	0.245854	0.0120789		0.22907	0.268544	0.291124	0.25011	0.259712	0.0132157		0.29284	0.233504	0.213581	0.291782	0.256269	0.225727	0.252284	0.0138765
	0.241372	0.25973	0.21816	0.262772	0.241372	0.244681	0.00799683		0.28588	0.281132	0.242938	0.237594	0.230615	0.255632	0.0115704		0.231391	0.277434	0.302787	0.255508	0.26678	0.0152464		0.29899	0.240717	0.224759	0.300668	0.264319	0.231854	0.260218	0.0136608
	0.252757	0.264154	0.222732	0.276556	0.252757	0.253792	0.00892306		0.29509	0.284238	0.246177	0.246916	0.236779	0.26184	0.0116262		0.238101	0.28376	0.312799	0.26345	0.274527	0.0158102		0.302388	0.245731	0.231509	0.313406	0.272955	0.241191	0.267863	0.0139223
	0.252131	0.274157	0.224547	0.283274	0.252131	0.257248	0.0102102		0.295137	0.281176	0.256032	0.247743	0.24514	0.265046	0.00985529		0.242794	0.292109	0.314767	0.266949	0.279155	0.0155646		0.307953	0.252146	0.24098	0.314945	0.271983	0.24333	0.271889	0.0133106
	0.255105	0.280621	0.231843	0.294751	0.255105	0.263485	0.0109838		0.297682	0.294279	0.264844	0.256137	0.250649	0.272718	0.00977766		0.247805	0.30363	0.323425	0.273001	0.286965	0.0166724		0.309036	0.25304	0.248859	0.316579	0.276	0.254356	0.276312	0.0122061
	0.254674	0.29013	0.222908	0.303272	0.254674	0.265131	0.0142849		0.294808	0.293685	0.268399	0.26103	0.255124	0.274609	0.00829002		0.250633	0.311332	0.328138	0.273741	0.290961	0.0176069		0.313028	0.257689	0.254215	0.313431	0.278093	0.255884	0.278723	0.0114697
