# Supplementary material for: Expression of a CO2-permeable aquaporin enhances mesophyll conductance in the C4 species Setaria viridis
Source: eLife journal article supplement (doi:10.7554/elife.70095), 2021-11-24
Supplement: supp [file Figure 2-figure supplement 1 - source data 1.docx]

**Figure 2-figure supplement 1 - Source data 1. Uncropped images of western blots**

Figure 2-figure supplement 1 - source data 2


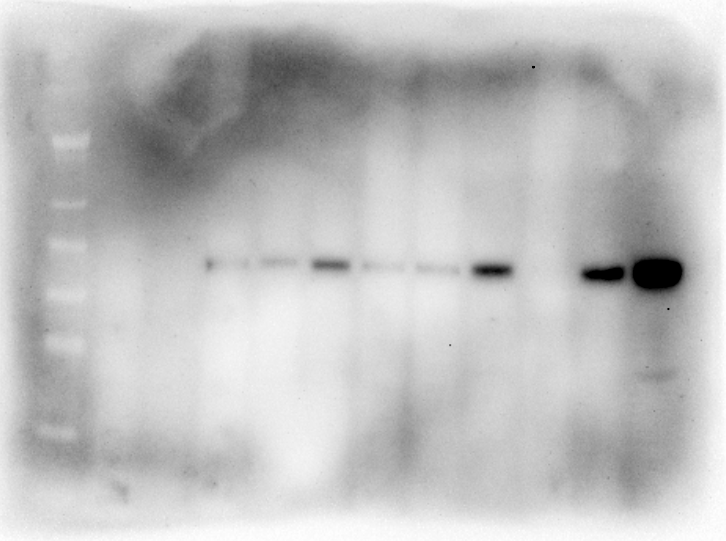


SiPIP2;7-FLAG

Figure 2-figure supplement 1 - source data 3


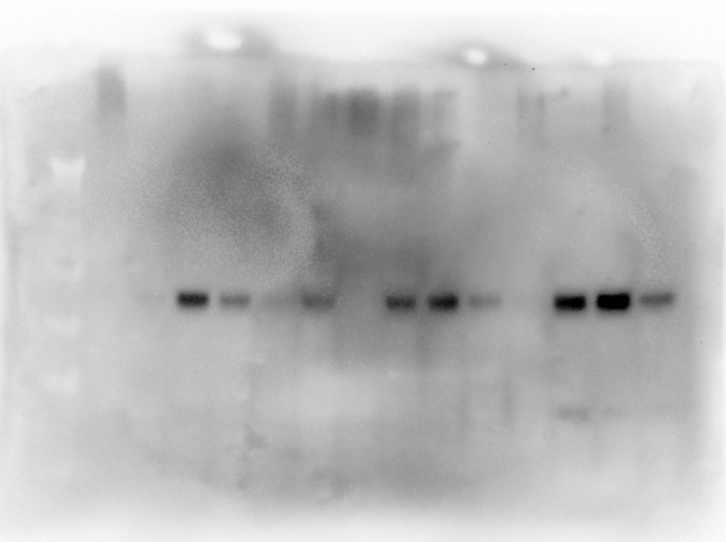


SiPIP2;7-FLAG

Figure 2-figure supplement 1 - source data 4


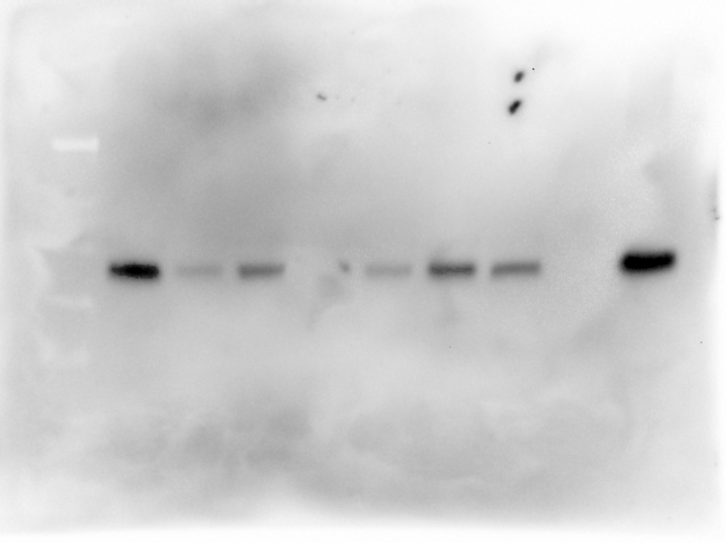


SiPIP2;7-FLAG
