# Supplementary material for: Expression of a CO2-permeable aquaporin enhances mesophyll conductance in the C4 species Setaria viridis
Source: eLife. 2021 Nov 29;10:e70095. doi: 10.7554/eLife.70095 (PMC8648302; doi:10.7554/eLife.70095)
Supplement: Supplementary file 1. [file elife-70095-supp1.xlsx]

## Sheet: Sheet1
Setaria italica			Setaria viridis
Name	NCBI ID	AA length	Name	AA length	% identity
SiPIP1;1	Si010758m	288	SvPIP1;1	288	100
SiPIP1;2	Si017731m	337	SvPIP1;2	289	100
SiPIP1;5	Si017991m	288	SvPIP1;5	288	100
SiPIP1;6	Si007002m	299	SvPIP1;6	299	100
SiPIP2;1	Si030703m	289	SvPIP2;1	289	100
SiPIP2;2	Si039883m	294	SvPIP2;2	294	100
SiPIP2;3	Si036923m	284	SvPIP2;3	284	100
SiPIP2;4	Si017990m	288	SvPIP2;4	290	99.3
SiPIP2;5	Si010750m	290	SvPIP2;5	290	100
SiPIP2;6	Si030713m	286	SvPIP2;6	286	100
SiPIP2;7	Si030712m	286	SvPIP2;7	286	100
SiPIP2;8	Si030718m	285	SvPIP2;8	285	100
