# Supplementary material for: Expression of a CO2-permeable aquaporin enhances mesophyll conductance in the C4 species Setaria viridis
Source: eLife. 2021 Nov 29;10:e70095. doi: 10.7554/eLife.70095 (PMC8648302; doi:10.7554/eLife.70095)
Supplement: Supplementary file 2. — Aquaporins have six transmembrane α-helices (H1-H6) joined by five loops (LA-LE). The monomeric channel is characterized by two NPA (Asn, Pro, Ala) motifs on loops A and E and along with the aromatic/arginine selectivity filter, these largely dictate the transport selectivity of substrates through the monomeric channels (Azad et al., 2016). Froger’s positions indicate additional residues that are predicted for substrate specificity (Froger et al., 1998). [file elife-70095-supp2.xlsx]

## Sheet: Sheet1
			Gene Name	Gene Alias	Accession number				NPA I motif		NPA II motif		ar/R						Froger's positions
			McGaughey et al., 2016	Azad et al., 2016	Phytozome		NCBI		LB		LE		H2	LC	H5	LE1	LE2		P1	P2	P3	P4	P5
	PIP1	Clade I	SiPIP1;1	SiPIP1;2	Seita.7G196700.1		XP_004976483		S G G H I N P A V T		G T G I N P A R S L G		F	G	H	T	R		Q	S	A	F	W
			SiPIP1;2	SiPIP1;1	Seita.1G264900.1		XP_004953388		S G G H I N P A V T		G T G I N P A R S L G		F	G	H	T	R		Q	S	A	F	W
			SiPIP1;5	SiPIP1;3	Seita.1G372300.1		XP_004954451		S G G H I N P A V T		G T G I N P A R S L G		F	G	H	T	R		Q	S	A	F	W
			SiPIP1;6	SiPIP1;4	Seita.4G089800.1		XP_004964964		S G G H I N P A V T		G T G I N P A R S L G		F	G	H	T	R		V	S	A	F	W
	PIP2	Clade I	SiPIP2;1	SiPIP2;5	Seita.2G123000.1		XP_004956113		S G G H I N P A V T		G T G I N P A R S L G		F	G	H	T	R		Q	S	A	F	W
			SiPIP2;4	SiPIP2;4	Seita.1G241900.1		XP_004953172		S G G H I N P A V T		G T G I N P A R S L G		F	G	H	T	R		Q	S	A	F	W
			SiPIP2;5	SiPIP2;3	Seita.7G170200.1		XP_004976254		S G G H I N P A V T		G T G I N P A R S L G		F	G	H	T	R		Q	S	A	F	W
			SiPIP2;6	SiPIP2;2	Seita.2G123200.1		XP_004956115		S G G H I N P A V T		G T G I N P A R S L G		F	G	H	T	R		Q	S	A	F	W
			SiPIP2;7	SiPIP2;1	Seita.2G123300.1		XP_004956116		S G G H I N P A V T		G T G I N P A R S L G		F	G	H	T	R		Q	S	A	F	W
	PIP2	Clade II	SiPIP2;2	SiPIP2;6	Seita.9G219400.1		XP_004986496		S G G H I N P A V T		G T G I N P A R S F G		F	G	H	T	R		H	S	A	F	W
			SiPIP2;3	SiPIP2;7	Seita.9G268100.1		XP_012698174		S G G H V N P A V T		G T G I N P A R S L G		F	G	H	T	R		H	S	A	F	W
			SiPIP2;8	SiPIP2;8	Seita.2G291500.1		XP_004957505		S G G H I N P A V T		G T G I N P A R S L G		F	G	H	T	R		T	S	A	F	W
							Substrate-specific signature sequences for CO2		S G G H I N P A V T		G T G I N P A R S L G		F	-	H	T	R		Q/M	S	A	F	W
