# Supplementary material for: Expression of a CO2-permeable aquaporin enhances mesophyll conductance in the C4 species Setaria viridis
Source: eLife. 2021 Nov 29;10:e70095. doi: 10.7554/eLife.70095 (PMC8648302; doi:10.7554/eLife.70095)
Supplement: Supplementary file 3. [file elife-70095-supp3.xlsx]

## Sheet: Sheet1
Gene target	Forward primer	Reverse primer
SvPIP2;6	CAGAGCGGCTTCTACGCT	GCGTTGCGCTTGGGATCC
SvPIP2;7	TGTCCCTGGTGCGCGCAA	GAGAACGAAGGTGCCGACA
Ubiquitin	GATCTCCGCCCCAGCAAGAT	ATGCCCTCCTTGTCCTGGAT
Elongation factor 1	GCTGCAACAAGATGGATGCC	CCAGAGATTGGGACGAAGGC
Tubulin	CTAAAGCTCGCCACCCCTAC	GTCGGAGTTGAGCTGACCAG
